# Supplementary material for: Chromosomal Diversification in Pseudacanthicus Species (Loricariidae, Hypostominae) Revealed by Comparative Mapping of Repetitive Sequences
Source: MDPI journal article supplement (doi:10.3390/ani12192612), 2022-09-29
Supplement: s1 [file s1]

**Title:** Chromosomal diversification in *Pseudacanthicus* species (Loricariidae, Hypostominae) revealed by comparative mapping of repetitive sequences

**Authors:** Kevin Santos da Silva, Augusto César Paes de Souza, Luís Reginaldo Ribeiro Rodrigues, Julio Cesar Pieczarka, Cleusa Yoshiko Nagamachi.

**Data Supplemental file:**

*DNA barcoding methods*

DNA extraction was processed with a column based commercial kit PureLink Genomic DNA Kit (ThermoFisher Scientific) and the amounts were evaluated in a 1% agarose gel stained with Gelred (Biotium). DNA barcode sequence of the *Cytochrome c Oxidase subunit I* (COI) mitochondrial gene were amplified using the universal primers Fish F1 and Fish R1. The reactions were assembled in 25 µL, containing 15 µL sterile H<sub>2</sub>O, 2.8 µL dNTP mix (1.25 mM), 2.5 µL buffer 10X (200 mM Tris-HCl (pH = 8,4) + 500 mM KCl), 2.5 µL MgCl<sub>2</sub> (50 mM), 0.5 µL of each primer (5µM), 0.2 µL Taq DNA polymerase (5U/µL) and 1 µL of genomic DNA (around 100ng). The cycling profile followed as 95°C/2min, 35 cycles of 94°C/30sec, 54°C/30sec and 72°C/1min, and a final step of 72°C/10min. in a Pxe 0.2 thermocycler (ThermoFisher Scientific). We evaluated the amplicons with a 1% agarose gel stained with Gelred and purified the PCR products with PEG8000. DNA barcode sequences were generated in an ABI 3500 genetic analyzer (Applied Biosystems) using the chemistry Big Dye Terminator V.3 Cycle Sequencing kit (Applied Biosystems, Waltham, Massachusetts, USA).

*Molecular taxonomic identification*

The chromatograms of COI sequences were inspected for base calling quality and converted to fasta file format, using the programs FinchTV v1.4.0 and BioEdit v. 7.2.5. The DNA barcodes (fasta file) were pasted in the ID Engine interface ([www.boldsystems.org](http://www.boldsystems.org)) and processed for taxonomic identification based on a percentage of sequence similarity against a DNA barcode library currently constituted with 4.7 million of COI sequences, representative of 241,692 species. We assumed a cutoff of 97% similarity for correct species identity, in order to recover the best sequence match with DNA barcodes linked to formally curated nominal taxa.

**DNA barcode sequences obtained for *Pseudacanthicus* species analyzed in this study:**

*Pseudacanthicus spinosus*

>P4212

TTCTTRGGGAYYGAGTGSCCGAATCTGGCATGGTTGGCCAGTTCCTCASTCTTTTTTTTCGA  
GCTGAGCTRAGCAACCCGGTTCTMTACTARGTGATGACCAAATTTATAATGTCATCGTTACT  
GCACATGCTTTTGTAATGATTTTCTTTATAGTAATACCGATTATGATTGGAGGCTTTGGAAAT  
TGACTAGTACCACTAATAATTGGAGCACCTGACATAGCCTTTCCACGAATAAATAATATAAG  
CTTCTGATTACTTCCACCTTCATTCCCTTCTACTACTAGCCTCTTCAGGAGTTGAAGCGGGAG  
CAGGGACAGGTTGGACTGTATATCCTCCACTCGCTGGAAATTTAGCTCACGCAGGAGCTTC  
AGTAGACCTTACTATCTTTTCACTTCATCTAGCTGGTGTCTCCTCAATTCTTGGAGCAATTAA  
CTTTATCACTACAATCATTAATATAAAACCCCCAGCTATTTACAATACCAAACCCCTTTATT  
TGTATGAGCCTTACTTATTACAGCTGTCTACTCTACTTTCACTACCAGTTCTAGCTGCTG  
GAATCACAATGTTATTAACAGACCGAAACCTGAATACTACCTTCTTCGACCCTGCAGGAGG  
CGGGGACCCAATCCTTTACCAACACTTATTCTGATTCTTTGGCCACCCRARAARTMGGTWS  
AACCAAC

*Pseudacanthicus leopardus*

>P4252

TTTWATAGCTGCTTGGTGCTTGAGCCGGATGGTTGGCACAGCCCTCAGCCTTTTAATTTCGA  
GCTGAGCTAAGCCAACCCGGTTCTCTACTAGGTGATGACCAAATTTATAATGTCATCGTTACT  
TGCACATGCCTTTGTAATGATTTTCTTTATAGTAATACCAATTATGATTGGAGGCTTTGGAAA  
CTGACTAGTACCACTAATAATTGGAGCACCTGACATAGCCTTTCCACGAATAAATAATATAA  
GCTTCTGACTACTTCCACCTTCATTCCCTTTACTACTAGCCTCTTCAGGAGTTGAGGCGGGGA  
GCAGGGACAGGTTGGACTGTATATCCTCCACTCGCTGGAAATTTAGCCACGCAGGAGCT  
TCAGTAGACCTTACTATCTTTTCACTTCATCTAGCTGGTGTCTCCTCAATTCTTGGAGCAATT  
AACTTTATCACTACAATCATTAATATAAAACCCCCAGCTATTTACAATACCAAACCCCTTTA  
TTTGTATGAGCCTTACTTATTACAGCTGTACTACTCTACTTTCACTGCCTGTTCTAGCTGCT  
GGAATTACAATGTTACTAACAGACCGAAACCTAAATACTACCTTCTTCGACCCTGCAGGAG  
GCGGGGACCCAATCCTTTACCAACACTTATTCTGATTCTTTGGCCACCCRGAAAGTCTGTA  
AAAACCC

*Pseudacanthicus* sp.

>P4258

TTMMTTAGTGTTTGGTGCTGAGCTGGATGGTTGGCACAGCCCTCAGCCTTTTAATTTCGAG  
CTGAGCTAAGCCAACCCGGTTCTCTATTAGGTGATGACCAAATTTATAATGTCATCGTTACT  
GCACATGCTTTTGTAATGATTTTCTTTATAGTAATACCAATTATGATTGGAGGCTTTGGAAAT  
TGACTAGTACCACTAATAATTGGAGCACCTGACATAGCCTTTCCACGAATAAATAATATAAG  
CTTCTGATTACTTCCACCTTCATTCCCTTCTACTACTAGCCTCTTCAGGAATTGAAGCGGGAG  
CAGGGACAGGTTGGACTGTATATCCTCCACTCGCTGGAAATTTAGCTCACGCAGGAGCTTC  
AGTAGACCTTACTATCTTTTCACTTCATCTAGCTGGTGTCTCCTCAATTCTTGGAGCAATTAA  
CTTTATCACTACAATCATTAATATAAAACCCCCAGCTATTTACAATACCAAACCCCTTTATT  
TGTATGAGCCTTACTTATTACRGCTGTCTACTCTACTTTCACTACCAGTTCTARCTGCTG  
GAATCACARTGTTTRKTAACAGACCGAAASCTGAATACTRCCTTCKKCGRCCCTRCASGAGG  
CGGGGACSSAATCCTTTACCAACACTTRKKMRARAWWCTTWRARMCACSCAGRRAAGKCT  
GTK

**Note:** These sequences are showed in forward direction without edition or manipulation.

**Table S1:** Taxonomic identification of *Pseudacanthicus* specimens based on DNA barcode (COI sequence) similarity through ID engine tool ([www.boldsystems.org](http://www.boldsystems.org)).

| Voucher*                                                                                                           | Field number | Species                          | Molecular ID (COI sequence)                       | % similarity    |
|--------------------------------------------------------------------------------------------------------------------|--------------|----------------------------------|---------------------------------------------------|-----------------|
| P4212                                                                                                              | QDB_16       | <i>Pseudacanthicus spinosus</i>  | <i>Pseudacanthicus spinosus</i>                   | 99.17           |
|                                                                                                                    | QDB_17       | <i>Pseudacanthicus spinosus</i>  | <i>Pseudacanthicus spinosus</i>                   | 97.05           |
|                                                                                                                    | QDB_18       | <i>Pseudacanthicus spinosus</i>  | not evaluated                                     | -               |
|                                                                                                                    | QDB_19       | <i>Pseudacanthicus spinosus</i>  | <i>Pseudacanthicus spinosus</i>                   | 98.00           |
|                                                                                                                    | QDB_20       | <i>Pseudacanthicus spinosus</i>  | <i>Pseudacanthicus spinosus</i>                   | 99.84           |
|                                                                                                                    | QDB_21       | <i>Pseudacanthicus spinosus</i>  | <i>Pseudacanthicus spinosus</i>                   | 99.83           |
|                                                                                                                    | QDB_22       | <i>Pseudacanthicus spinosus</i>  | <i>Pseudacanthicus spinosus</i>                   | 99.84           |
|                                                                                                                    | QDB_23       | <i>Pseudacanthicus spinosus</i>  | <i>Pseudacanthicus spinosus</i>                   | 98.05           |
| P4252                                                                                                              | IBA_1        | <i>Pseudacanthicus leopardus</i> | <i>Pseudacanthicus leopardus</i>                  | 99.83           |
|                                                                                                                    | IBA_2        | <i>Pseudacanthicus leopardus</i> | <i>Pseudacanthicus leopardus</i>                  | 100             |
| P4258                                                                                                              | IBA_3        | <i>Pseudacanthicus</i> sp.       | <i>Pseudacanthicus</i> sp.;<br><i>P. spinosus</i> | 99.68;<br>99.67 |
|                                                                                                                    | IBA_4        | <i>Pseudacanthicus</i> sp.       | not evaluated                                     | -               |
| <b>Legends:</b> (*) Coleção de Ictiologia do Centro de Estudos Avançados da Biodiversidade - CEABIO, UFPA, Brazil. |              |                                  |                                                   |                 |
